# Supplementary material for: First in situ imaging of large colonial Phaeocystis quantifies inefficient carbon export
Source: Research Square preprint supplement (doi:10.21203/rs.3.rs-7773706/v1), 2025-10-07
Supplement: Supplementary file 1 [file db3b0a4c4329c9e93397b74e.pdf]

## First *in situ* imaging of large colonial *Phaeocystis* quantifies inefficient carbon export

**Authors:** Manon Laget<sup>1\*</sup>, Andreas Rogge<sup>2,3</sup>, Matthias Wietz<sup>4,5</sup>, Lillian Musselman<sup>1</sup>, Ying-Yu Hu<sup>1</sup>, Niall McGinty<sup>1,6</sup>, Sing-how Tuo<sup>1,7</sup>, Moritz Holtappels<sup>2</sup>, Zoe V. Finkel<sup>1</sup>, Anya M. Waite<sup>1,8</sup>

<sup>1</sup> Department of Oceanography, Dalhousie University, Halifax, NS, Canada

<sup>2</sup> Benthic Ecology, Alfred Wegener Institute Helmholtz Centre for Polar and Marine Research, Bremerhaven, Germany

<sup>3</sup> Institute of Environmental Physics, University of Bremen, Bremen, Germany

<sup>4</sup> Deep-Sea Ecology and Technology, Alfred Wegener Institute Helmholtz Centre for Polar and Marine Research, Bremerhaven, Germany

<sup>5</sup> Institute for Chemistry and Biology of the Marine Environment, University of Oldenburg, Oldenburg, Germany

<sup>6</sup> Marine and Freshwater Research Institute (MFRI), Fornubúðir 5, 220 Hafnafjörður, Iceland

<sup>7</sup> Department of Oceanography, National Sun Yat-sen University, Kaohsiung, Taiwan

<sup>8</sup> Ocean Frontier Institute, Dalhousie University, 1355 Oxford Street, Halifax, NS, Canada

\* Corresponding author

Corresponding author email address: [manon.laget@protonmail.com](mailto:manon.laget@protonmail.com)

|                            |                                                                                     |                                                                                                                                                                                                       |
|----------------------------|-------------------------------------------------------------------------------------|-------------------------------------------------------------------------------------------------------------------------------------------------------------------------------------------------------|
| <i>Phaeocystis</i> sp.     |    | <ul style="list-style-type: none"> <li>- Smooth and regular edges</li> <li>- Color mostly uniform and homogenous structure within</li> <li>- Sometimes presence of very small, darker buds</li> </ul> |
| Rhizaria X                 |    | <ul style="list-style-type: none"> <li>- Grainy structure</li> <li>- Central darker dot</li> <li>- Darker edge</li> </ul>                                                                             |
| Colonial Collodaria        |    | <ul style="list-style-type: none"> <li>- Multiple dots (single collodarian cells)</li> <li>- Halo at the periphery (more or less visible)</li> </ul>                                                  |
| Aulacanthidae (Phaeodaria) |   | <ul style="list-style-type: none"> <li>- Spicules (more or less visible)</li> <li>- Grainy structure</li> <li>- Dark phaeodium in the center</li> </ul>                                               |
| Round detritus             |  | <ul style="list-style-type: none"> <li>- Grainy structure</li> <li>- Irregular edges</li> <li>- Possible presence of darker or lighter spots in the structure</li> </ul>                              |

Supplementary Figure 1. Large *Phaeocystis* colony alongside objects that may be confused with it, with distinguishing features highlighted to differentiate them from *Phaeocystis* colonies. Rhizaria X and colonial Collodaria were observed in the Weddell Sea; Aulacanthidae and round detritus were observed in both the Labrador Sea and the Weddell Sea.

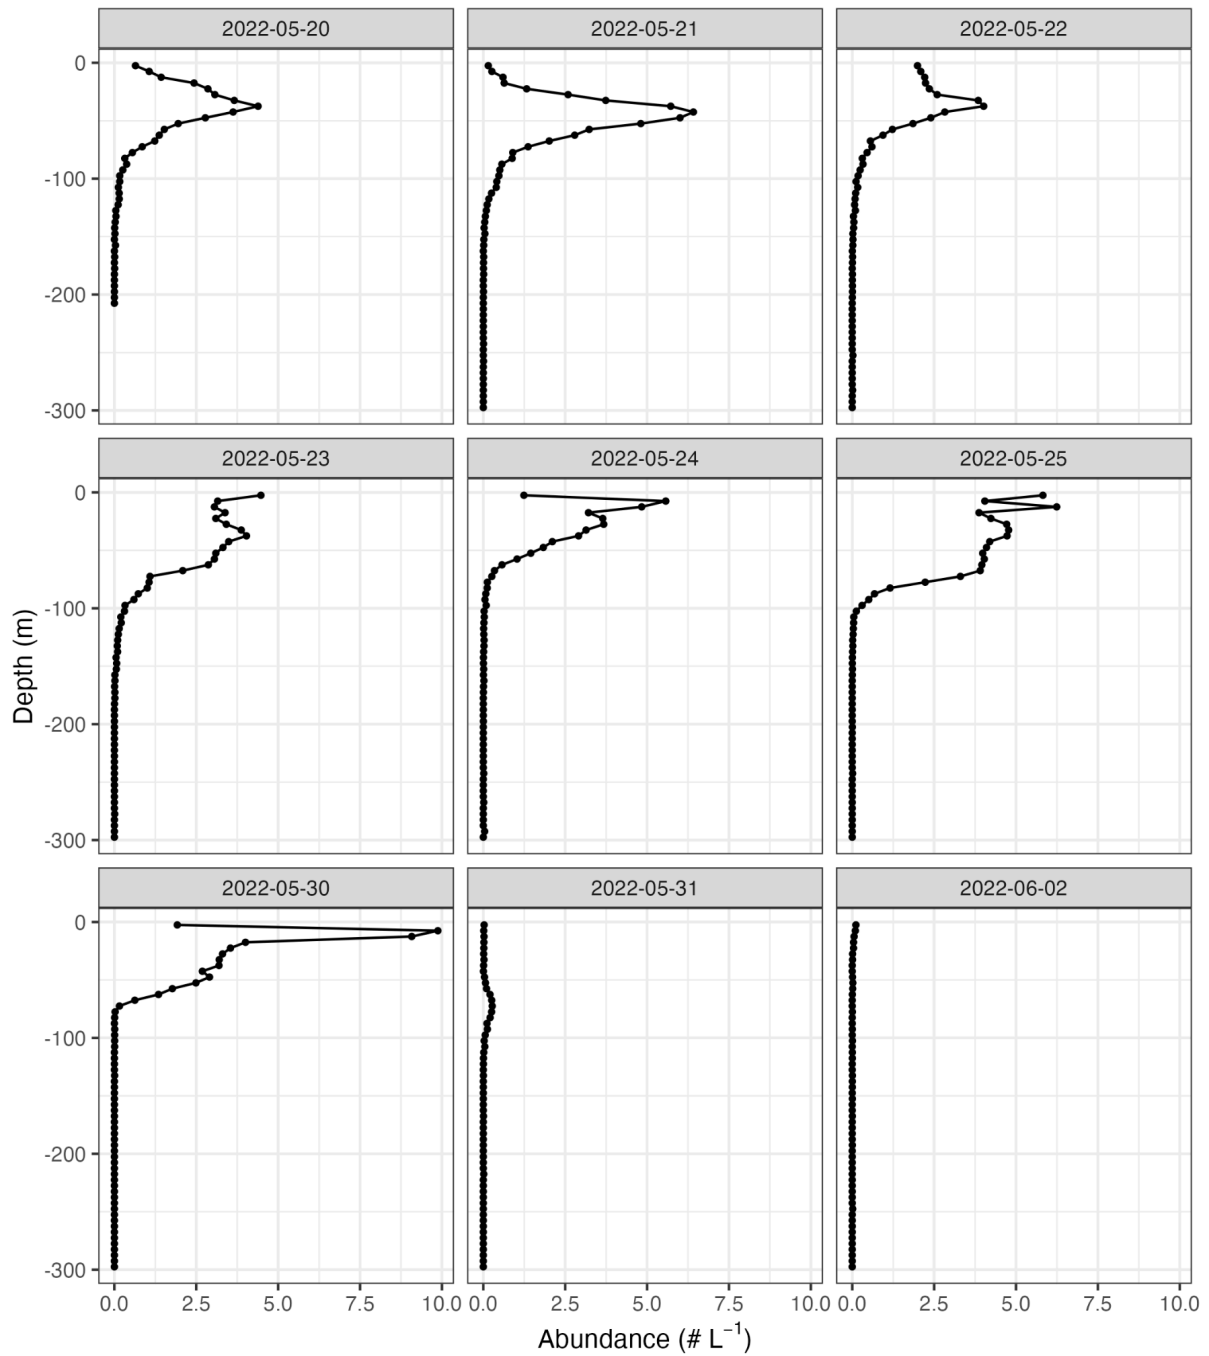

Supplementary Figure 2. Daily averaged abundance profiles of large (>600  $\mu\text{m}$ ) *Phaeocystis* colonies in the Labrador Sea.

Supplementary Table 1. Daily Spearman correlation coefficient between daily large (>600  $\mu\text{m}$ ) *Phaeocystis* colony abundance and chlorophyll a concentration in the Labrador Sea. Tests were performed with 146 depth bins for each day.

| Date       | Spearman's $\rho$ coefficient | <i>p</i> -value |
|------------|-------------------------------|-----------------|
| 20-05-2022 | 0.95                          | <0.001          |
| 21-05-2022 | 0.98                          | <0.001          |
| 22-05-2022 | 0.91                          | <0.001          |
| 23-05-2022 | 0.81                          | <0.001          |
| 24-05-2022 | 0.88                          | <0.001          |
| 25-05-2022 | 0.55                          | 0.002           |
| 30-05-2022 | 0.93                          | <0.001          |
| 31-05-2022 | 0.65                          | <0.001          |
| 02-06-2022 | 0.60                          | <0.001          |

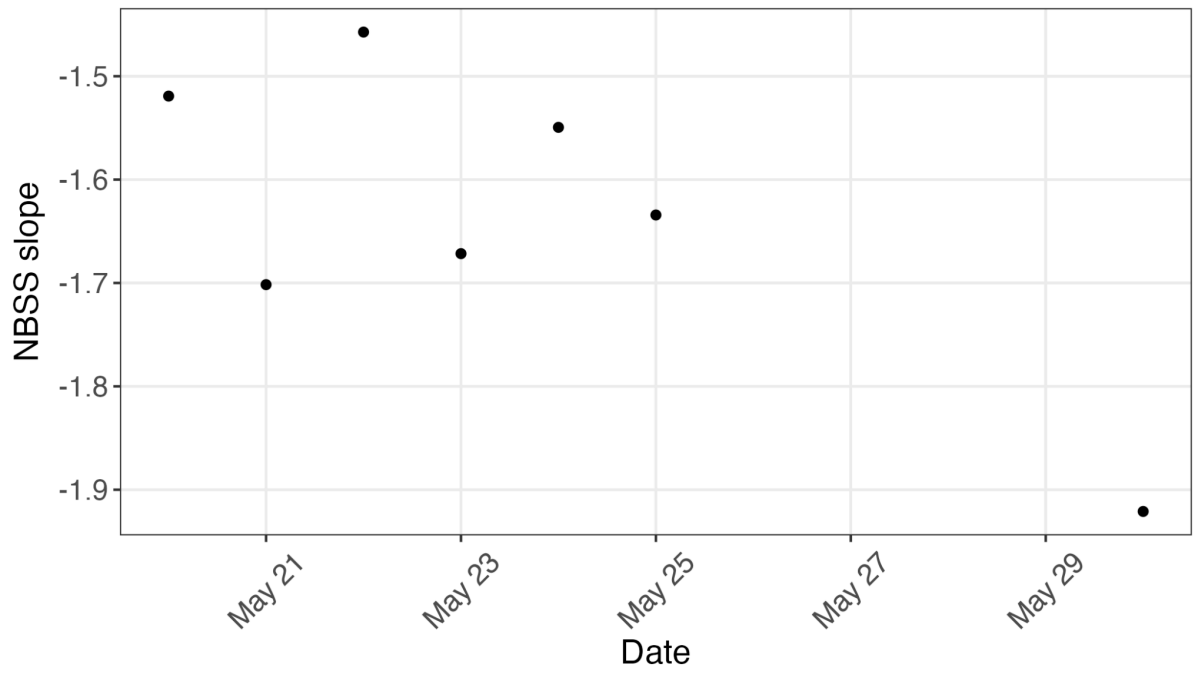

Supplementary Figure 3. Slope of the Normalized Biomass Size Spectrum estimated for each day using the biovolume of large ( $>600\ \mu\text{m}$ ) *Phaeocystis* colonies in the Labrador Sea.

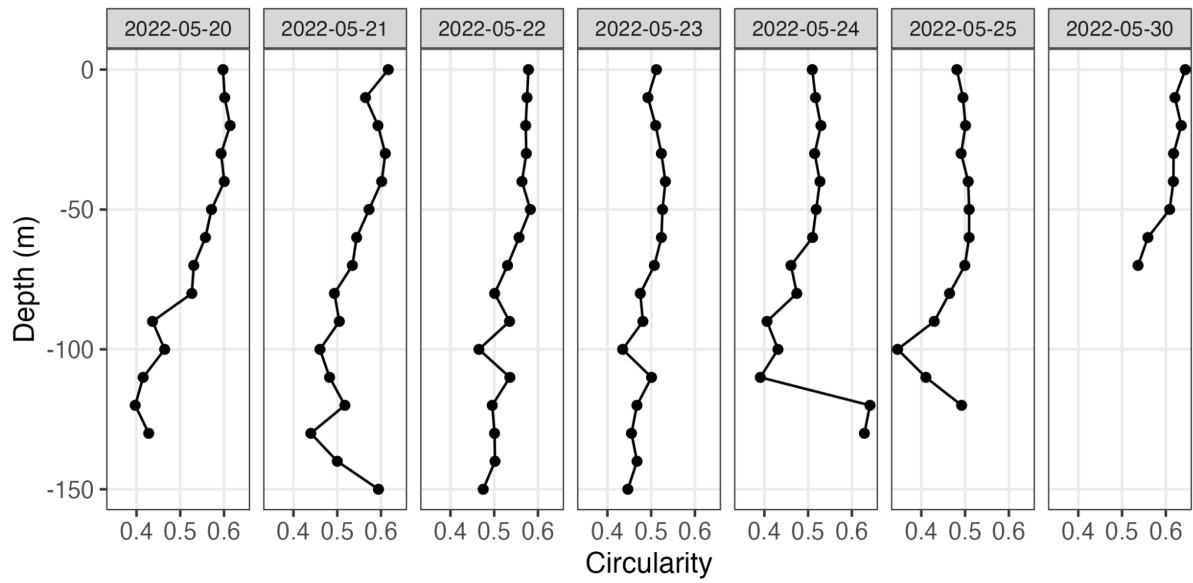

Supplementary Figure 4. Evolution of mean circularity of large (>600 μm) *Phaeocystis* colonies with depth for each day in the Labrador Sea. Values are averaged over 10-m depth bins. Only bins with at least 5 images are shown.

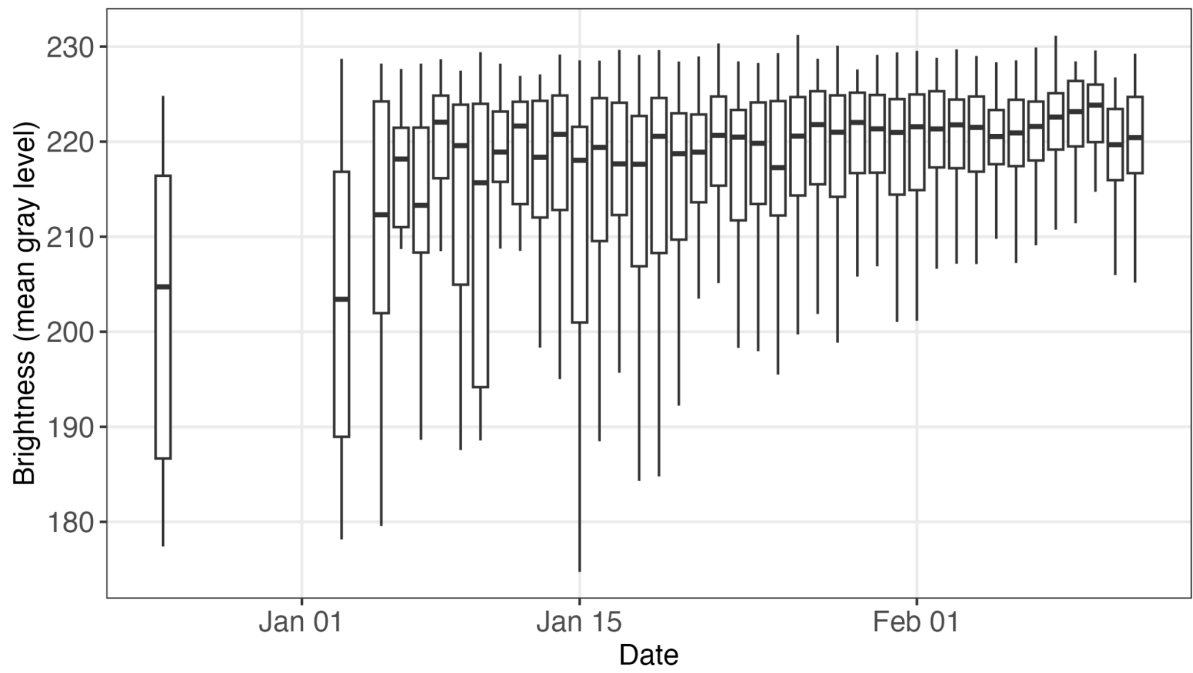

Supplementary Figure 5. Distribution of mean gray level of pixels in large (>600 μm) *Phaeocystis* colony images for each day with at least 10 images recorded in the Weddell Sea.

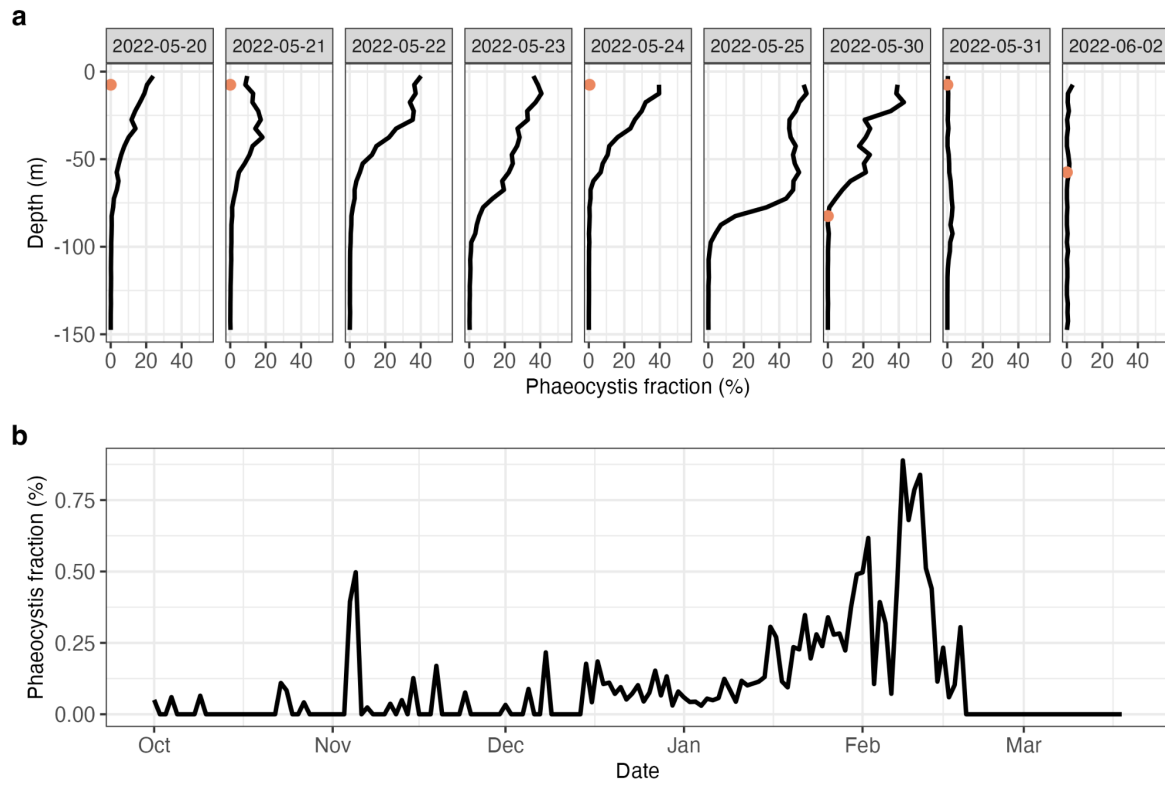

Supplementary Figure 6. Contribution of large ( $>600\ \mu\text{m}$ ) *Phaeocystis* colony to  $>600\ \mu\text{m}$  total biovolume in **a**, the Labrador Sea and **b**, the Weddell Sea. **a**, Points show the contribution of colonies to total particulate carbon.
